# Supplementary material for: Helicity and Vorticity of Pulmonary Arterial Flow in Patients With Pulmonary Hypertension: Quantitative Analysis of Flow Formations
Source: PubMed Central journal article supplement — J Am Heart Assoc. 2017 Dec 20;6(12):e007010. doi: 10.1161/JAHA.117.007010 (PMC5779020; doi:10.1161/jaha.117.007010), 2017-12-20

# **SUPPLEMENTAL MATERIAL**

**Figure S1.** Bland-Altman graphical representation of inter- and intra- observer agreement analysis for helicity computation in RV outflow tract – MPA conduit. **A)** Interobserver analysis in control cases revealed the mean difference  $-0.4$  m/s/s (red solid line) with narrow gap between upper and lower 95% confident intervals (red dashed lines). **B)** Good agreement also existed in helicity measurement in PH population with the mean difference of  $0.4$  m/s/s. **C)** and **D)** Intraobserver agreement assessed in 6 months period revealed very good agreement for both control and PH groups.

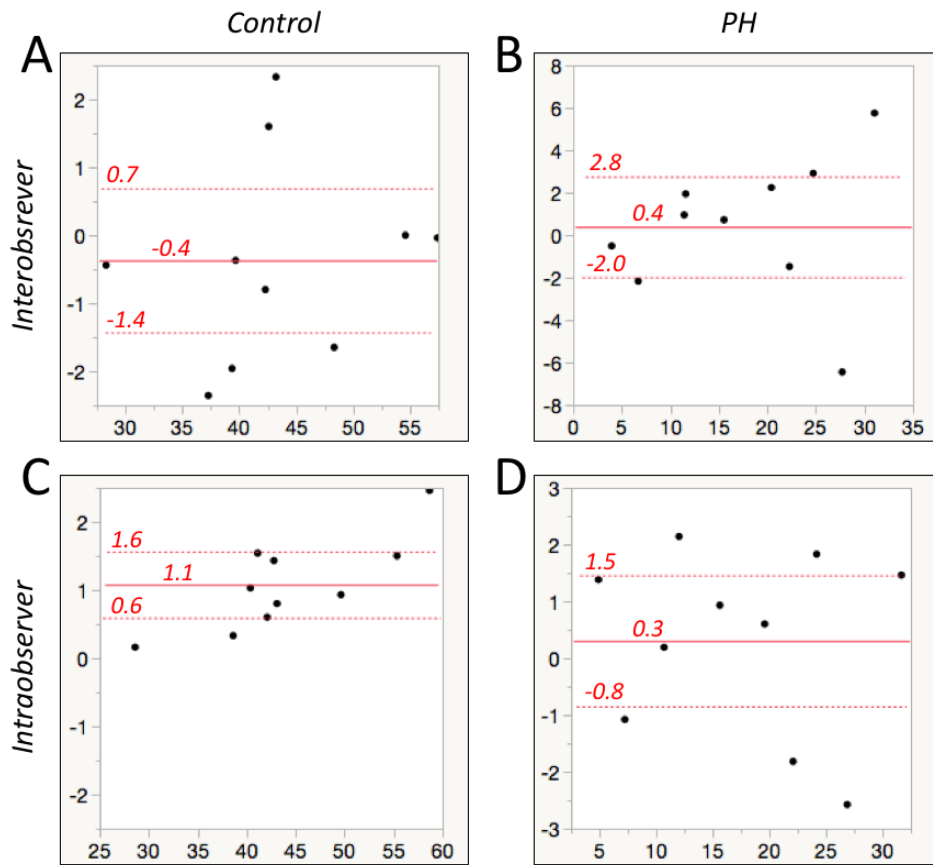

Supplement: JAH3-6-e007010-s001.pdf [file JAH3-6-e007010-s001.pdf]
